# Supplementary material
Source: PubMed Central journal article supplement (PMC3529066)
Supplement: 1211844110_pnas.201211844SI.pdf [file 1211844110_pnas.201211844SI.pdf]

# Supporting Information

Stacey et al. 10.1073/pnas.1211844110

## SI Materials and Methods

**Diurnal Pattern of Home Cage Ethanol Drinking.** The home cage drinking behavior was monitored by a so-called drinkometer e-motion system. This device (INFRA-E-MOTION GmbH) allowed us to study microdrinking patterns and thus, record even very small drinking bouts in the microliter range.

**Taste Preference Tests.** In alcohol-naïve and -experienced WT and *ras-specific guanine-nucleotide releasing factor 2* (*Rasgrf2*<sup>-/-</sup>) mice, intake of saccharin (sweet) and quinine (bitter) solutions was measured (against water) in a two-bottle free choice test over 9 d. Bottles were weighed, and their positions were changed every 3 d.

**Determination of Blood Alcohol Levels.** Alcohol-naïve and -experienced WT and *Rasgrf2*<sup>-/-</sup> mice were injected i.p. with 3.5 g/kg ethanol. Blood alcohol levels were measured by the NADH enzyme spectrophotometric method (Greiner) from blood samples (25–30  $\mu$ L) drawn from the saphenous vein at 30, 60, 120, and 240 min after injection.

**Immunocytochemistry.** After a 3-d habituation to handling and injection, mice were injected with ethanol (1 g/kg i.p.) or vehicle (NaCl 9 g/L) (1); 10 min after treatment, mice were anesthetized with pentobarbital (30 mg/kg i.p.; Sanofi-Aventis) and transcardially perfused with 4% paraformaldehyde in phosphate buffer, and brains were taken, postfixed overnight, and cut with a vibratome (Leica) into 30- $\mu$ m sections stored at  $-20^{\circ}\text{C}$ . Immunohistochemistry was carried out as described (2) using rabbit polyclonal antibodies for active diphospho-ERK (1:500; Cell Signaling Technology), biotinylated anti-IgG antibody (1:500; Vector Laboratories), and avidin–biotin complex (1:500; Vector Laboratories). Bright field microphotographs were analyzed with ImageJ software.

**Electrophysiology. Electrophysiology.** Animals (20–40 d) were anesthetized with ketamine (90 mg/kg) /xylazine (15 mg/kg) (Sigma-Aldrich) before preparation of horizontal brain slices (250  $\mu$ m) containing the ventral tegmental area (VTA). Slicing procedure was done in bubbled ice-cold slicing solution [slicing solution contained choline chloride (110 mM), glucose (25 mM), sodium bicarbonate (25 mM), magnesium chloride (7 mM), ascorbic acid (11.6 mM), sodium pyruvate (3.1 mM), potassium chloride (2.5 mM), sodium dihydrogen phosphate (1.25 mM), and calcium chloride (0.5 mM); artificial cerebrospinal fluid (ACSF) contained sodium chloride (124 mM), sodium bicarbonate (26.2 mM), glucose (11 mM), potassium chloride (2.5 mM), calcium chloride (1.3 mM), magnesium chloride (1 mM), and sodium dihydrogen phosphate (1 mM)]. Brain slices were left to recover in ACSF bubbled with 95% O<sub>2</sub> and 5% CO<sub>2</sub> for 1 h before being transferred to the recording chamber superfused at the rate of 2.5 mL/min. Recordings were made under an Olympus BX51WL. For all recordings, currents were amplified, filtered at 5 kHz, and digitized at 20 kHz. Access resistance was monitored by a hyperpolarizing step of 15-pA injection in current-clamp mode or 10-mV step in voltage-clamp mode [internal solution for voltage-clamp experiments contained caesium chloride (CsCl; 130 mM), NaCl (4 mM), MgCl<sub>2</sub> (2 mM), EGTA (1.1 mM), Hepes (5 mM), Na<sub>2</sub>ATP (2 mM), sodium creatine phosphate (5 mM), Na<sub>3</sub>GTP (0.6 mM), and spermine (0.1 mM)]. Synaptic currents were evoked by stimuli (0.05–0.1 ms) at 0.1 Hz through bipolar glass electrodes filled with ACSF placed rostrally to VTA. The AMPA receptor to NMDA receptor ratio was calculated by dividing the

peak amplitudes at +40 mV after digital subtraction of the AMPA + NMDA component and the AMPA component after APV (100  $\mu$ M). For current-clamp recordings [internal solution contained K-gluconate (140 mM), KCl (5 mM), Hepes (10 mM), EGTA (0.2 mM), MgCl<sub>2</sub> (2 mM), Na<sub>2</sub>ATP (4 mM), Na<sub>3</sub>GTP (0.3 mM), and creatine phosphate (10 mM)], a series of current steps (negative to positive) were injected to induce action potentials. For *I*<sub>A</sub> current, the ACSF was supplemented with 1  $\mu$ M tetrodotoxin, 0.4 mM cadmium chloride (CdCl<sub>2</sub>), and 5 mM tetraethylammonium to block Na<sup>+</sup>, Ca<sup>2+</sup> channels and delayed rectified potassium channels. *I*<sub>A</sub> currents were obtained by a two-step protocol, including a first depolarization from  $-30$  to  $+30$  mV and a second depolarization from  $-120$  to  $+30$  mV. The first protocol activates all residual K<sup>+</sup> channels but not *I*<sub>A</sub>, whereas the second protocol activates all K<sup>+</sup> channels including *I*<sub>A</sub>, which was obtained by software-based subtraction of the two components. All recordings were performed at 31–32  $^{\circ}\text{C}$ . Data were collected by a Multiclamp 700B (Molecular Devices) and analyzed by IGOR Wavemetrics (Wavemetrics). Slices were incubated with MEK inhibitors for 1 h before recordings. Dopamine neurons in the VTA were identified by the presence of *I*<sub>h</sub>.

**Genotyping.** DNA was extracted from whole-blood samples ( $\sim$ 10 mL) preserved in BD Vacutainer EDTA tubes (Becton, Dickinson and Company) using the Gentra Puregene Blood Kit (QIAGEN) according to the manufacturer's instructions. Genotype information was collected at 582,982 markers using the Illumina HumanHap610 Genotyping BeadChip (Illumina). SNPs with call rates of  $<98\%$ , minor allele frequency  $<1\%$ , or deviation from the Hardy–Weinberg equilibrium ( $P \leq 1 \times 10^{-4}$ ) were excluded from the analyses. Individuals with an ambiguous sex code, excessive missing genotypes (failure rate  $> 2\%$ ), and outlying heterozygosity (heterozygosity rate of 3 SDs from the mean) were also excluded. Identity-by-state similarity was used to estimate cryptic relatedness for each pair of individuals using PLINK software. Closely related individuals with identity by descent  $> 0.1875$  were eliminated from the subsequent analysis. Population stratification for the genotyping data was examined by principle component analysis using EIGENSTRAT software. The four HapMap populations were used as reference groups in the principle component analysis, and individuals with divergent ancestry (from Central European origin) were also excluded.

**Neuroimaging Analyses. Monetary incentive delay task.** This version of the monetary incentive delay task consisted of 66 10-s trials. In each trial, participants were presented with one of three cue shapes (cue = 250 ms) denoting whether a target (white square) would subsequently appear on the left or right side of the screen and whether 0, 2, or 10 points could be won in that particular trial. After a variable delay (4,000–4,500 ms) of fixation on a white cross-hair, participants were instructed to respond with a left or right button press as soon as the target appeared. Feedback on whether and how many points were won during the trial was presented for 1,450 ms after the response. A tracking algorithm adjusted task difficulty (i.e., target duration varied between 100 and 300 ms), and therefore, each participant successfully responded on  $\sim 66\%$  of trials. For each 5 points won, the participant would receive one food snack in the form of small chocolate candies. Only successfully hit trials were included for analysis.

**Functional MRI data analysis.** Functional MRI data were analyzed with SPM8 (Statistical Parametric Mapping; <http://www.fil.ion.ucl.ac.uk/spm>). Slice-time correction was conducted to adjust for time differences caused by multislice imaging acquisition, all

volumes were aligned to the first volume, and nonlinear warping was performed to an echo planar imaging (EPI) template. Images were then smoothed with a Gaussian kernel of 5-mm full width at half-maximum. At the first level of analysis, changes in the BOLD response for each subject were assessed by linear combinations at the individual subject level for each experimental condition, and each trial (i.e., reward anticipation high gain; reward feedback high gain) was convolved with the hemodynamic response function to form regressors that account for potential noise variance associated with the processing of reward anticipation. Estimated movement parameters were added to the design matrix in the form of 18 additional columns (3 translation, 3 rotation, 3 quadratic, and 3 cubic translation columns, and each 3 translations had a shift of  $\pm 1$  repetition time). Single-subject contrast images were normalized to Montreal Neurological Institute space. The normalized and smoothed single-subject contrast images were then taken to a second-level random effects analysis. Using the Marsbar toolbox (<http://marsbar.sourceforge.net>), the VS region of interest was extracted from the anticipation high gain vs. baseline contrast as well as the feedback high gain vs. baseline contrast. The extracted region of interest was based on the work by O'Doherty et al. (3) ( $x, y, z = \pm 15, 9, -9$ ; radius of 9 mm).

**Bioinformatic Analyses.** The SNP prioritization tool within pupasuite 3 (<http://pupasuite.bioinfo.cipf.es/>) was used to obtain putative functional annotation data pertaining to human SNPs (i.e., coding or noncoding; is there overlap with evolutionary conserved chromosomal regions or transcription factor binding sites?). The spatiotemporal mRNA expression of *RASGRF2* in humans was investigated using data from the BrainSpan Atlas of the Developing Human Brain (<http://www.brainspan.org/>) and the Allen Brain Atlas (<http://www.brain-map.org/>).

**Human Brain Tissue and Genotype-Specific Expression.** Brains from male control individuals ( $n = 42$ ) were obtained at autopsy at the Department of Forensic Medicine, Semmelweis University Medical School (Budapest). Causes of death in control subjects were acute cardiac failure or traffic accident. Control participants did not have psychiatric illness or alcohol or drug abuse during the last 10 y. The brains were microdissected and stored in the Human Brain Tissue Bank, Budapest. After removal from the skull, the brains were rapidly frozen on dry ice and stored at

$-70$  °C until microdissection (2 d to 2 mo later). At time of dissection, the brain samples were sliced into 1- to 1.5-mm coronal sections at  $0$ – $10$  °C. The dorsomedial prefrontal cortex (Brodmann area 9) was dissected just dorsal to the frontopolar area, including the most anterior portions of the superior and middle frontal gyri. The samples were stored at  $-80$  °C until further use. Tissue harvesting occurred after written informed consent was obtained from next of kin and local ethics committee (Semmelweis University) approval. Sample preparation and gene expression assay were as described (4, 5). The following primers were used for quantitative RT-PCR: *RASGRF2* forward: 5'-GCTTGTATACCTCTCTCTCCTGGT-3' and *RASGRF2* reverse: 5'-ACGCCCATTTTCCAGGTA-3'; *GAPDH* (housekeeping gene) forward: 5'-CATGAGAAGTATGACAACAGCCT-3' and *GAPDH* reverse: 5'-AGTCCTTCCACGATACCAAAGT-3'. The relative gene expression levels of *RASGRF2* to *GAPDH* ( $\Delta Ct$ ) were transformed using normal quantile transformation. We used a generalized linear model to assess the effect of allele on *RASGRF2* mRNA levels, with sex, age, post-mortem interval, and RNA integrity number included as covariates.

**IMAGEN Consortium.** IMAGEN Consortium: Albrecht, L., Andrew, C., Arroyo, M., Artiges, E., Aydin, S., Bach, C., Barbot, A., Boddaert, N., Bokde, A., Bricaud, Z., Bromberg, U., Bruehl, R., Cachia, A., Cattrell, A., Constant, P., Crombag, H., Czech, K., Dalley, J., Decideur, B., Fadai, T., Fernandes, A., Frouin, V., Fuchs, B., Gollier Briand, F., Gowland, P., Head, K., Heinrichs, B., Heym, N., Hübner, T., Ihlenfeld, A., Ireland, J., Ivanov, N., Jones, J., Kepa, A., Klaassen, A., Lalanne, C., Lanzerath, D., Lemaitre, H., Lubbe, S., Lüdemann, K., Mallik, C., Mangin, J.-F., Mar, A., Martinez-Medina, L., Massicotte, J., Mennigen, E., Mignon, X., Miranda, R., Müller, K., Paillere, M.-L., Pena-Oliver, Y., Poline, J.-B., Poustka, L., Rapp, M., Reed, L., Reuter, J., Ripke, S., Ripley, T., Robbins, T., Rodehacke, S., Rogers, J., Romanowski, A., Schilling, C., Schmal, C., Schmidt, D., Schneider, S., Schroeder, M., Schubert, F., Schwartz, Y., Speiser, C., Spranger, T., Steiner, S., Stephens, D., Strache, N., Ströhle, A., Struve, M., Subramaniam, N., Tahmasebi, A., Theobald, D., Topper, L., Vollstaedt-Klein, S., Walaszek, B., Werts, H., Whelan, R., Williams, S., Yacubian, J., Ziesch, V., Zibovicius, M., and Wong, C. P.

- Bertran-Gonzalez J, et al. (2008) Opposing patterns of signaling activation in dopamine D1 and D2 receptor-expressing striatal neurons in response to cocaine and haloperidol. *J Neurosci* 28(22):5671–5685.
- Valjent E, Pagès C, Hervé D, Girault J-A, Caboche J (2004) Addictive and non-addictive drugs induce distinct and specific patterns of ERK activation in mouse brain. *Eur J Neurosci* 19(7):1826–1836.
- O'Doherty J, et al. (2004) Dissociable roles of ventral and dorsal striatum in instrumental conditioning. *Science* 304(5669):452–454.
- Schumann G, et al. (2011) Genome-wide association and genetic functional studies identify autism susceptibility candidate 2 gene (AUTS2) in the regulation of alcohol consumption. *Proc Natl Acad Sci USA* 108(17):7119–7124.
- Sommer WH, et al. (2010) Human NPY promoter variation rs16147:T>C as a moderator of prefrontal NPY gene expression and negative affect. *Hum Mutat* 31(8):E1594–E1608.
